# Supplementary material for: The facile one-step aqueous synthesis of near-infrared emitting Cu+ doped CdS quantum dots as fluorescence bioimaging probes with high quantum yield and low cytotoxicity
Source: Royal Society of Chemistry journal article supplement (doi:10.1039/c5tb01209k), 2015-01-01
Supplement: c5tb01209k1.pdf [file c5tb01209k1.pdf]

## Supporting Information

1

2

3 The facile one-step aqueous synthesis of near-infrared emitting Cu<sup>+</sup>  
4 doped CdS quantum dots as fluorescence bioimaging probes with high  
5 quantum yield and low cytotoxicity

6

7 Ting-Ting Sun<sup>a, 1</sup>, Ming Wu<sup>b,c, 1</sup>, Xi-Wen He<sup>a</sup>, Wen-You Li<sup>a, \*</sup>, Xi-Zeng Feng<sup>b, \*</sup>

8

9 <sup>a</sup> College of Chemistry, Research Center for Analytical Sciences, State Key Laboratory of  
10 Medicinal Chemical Biology (Nankai University), Tianjin Key Laboratory of Molecular  
11 Recognition and Biosensing, Collaborative Innovation Center of Chemical Science and  
12 Engineering (Tianjin), Nankai University, 94 Weijin Road, Tianjin 300071, China. E-mail:  
13 [wyli@nankai.edu.cn](mailto:wyli@nankai.edu.cn)

14 <sup>b</sup> State Key Laboratory of Medicinal Chemical Biology (Nankai University), College of Life  
15 Science, Nankai University, 94 Weijin Road, Tianjin 300071, China. E-mail:  
16 [xzfeng@nankai.edu.cn](mailto:xzfeng@nankai.edu.cn)

17 <sup>c</sup> College of Life Sciences, Qufu Normal University, 57 Jingxuan West Road, Qufu 273165,  
18 China. E-mail: [wumingqufu@163.com](mailto:wumingqufu@163.com)

19 <sup>1</sup>These authors contributed equally to this work.

20

21

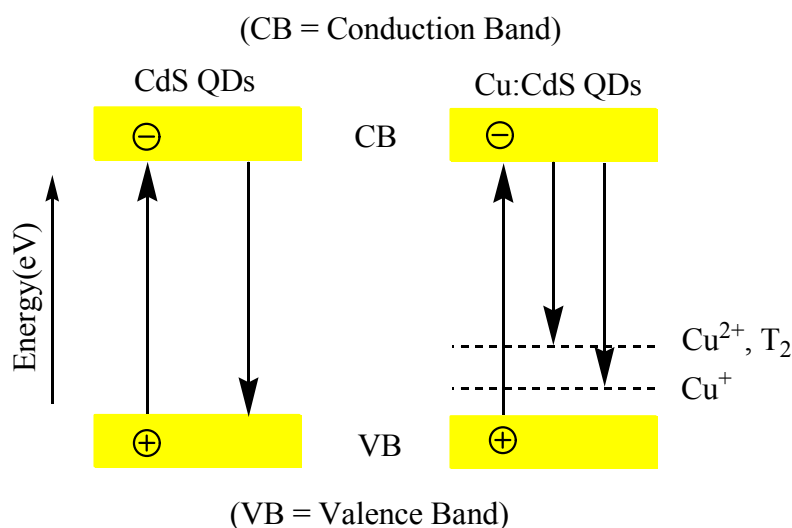

22

1 Fig. S1 Scheme of the mechanism for Cu dopant emission.

2

3

4 Table. S1 Previous Cu:CdS QDs properties.

5

| <b>Sulfur source</b> | <b>Heating atmosphere</b> | <b>Solvent</b> | <b>Temp. (°C)</b> | <b>Cu<sup>+</sup> or Cu<sup>2+</sup></b> | <b>λ<sub>max</sub> (nm)</b> | <b>QY%</b> | <b>Cell imaging</b> | <b>Ref.</b> |
|----------------------|---------------------------|----------------|-------------------|------------------------------------------|-----------------------------|------------|---------------------|-------------|
| Thiourea             | N <sub>2</sub>            | aqueous        | 100               | Cu <sup>+</sup>                          | 586                         | 21.86      | KB                  | 1           |
| Na <sub>2</sub> S    | Air                       | aqueous        | 100               | Cu <sup>2+</sup>                         | 722                         | <10        | HeLa                | 2           |
| Sulfur powder        | Air                       | organic        | 220               | Cu <sup>+</sup>                          | 680                         | 20-30      | -                   | 4           |
| Dodecanethiol        | Air                       | organic        | 200               | Cu <sup>+</sup>                          | 707                         | 15.8       | -                   | 7           |
| H <sub>2</sub> S gas | Air                       | organic        | 100               | Cu <sup>2+</sup>                         | 680                         | -          | -                   | 8           |
| Sulfur powder        | Air                       | organic        | 220               | Cu <sup>2+</sup>                         | 710                         | 65         | -                   | 24          |
| Thiourea             | Air                       | aqueous        | 95                | Cu <sup>+</sup>                          | 466-612                     | 20         | -                   | 25          |

6

1 SI. 1

2 The photoluminescence quantum yield (PLQY) of as-prepared Cu<sup>+</sup>:CdS QDs was  
3 counted by FLS 920 fluorescence spectrophotometer (Edinburgh, Britain) inherent  
4 calculator using the formula as:

5

$$6 \quad QY_{QDs} = \int L_{\text{emission}} / \int E_{\text{solvent}} - \int E_{\text{sample}}$$

7 L<sub>emission</sub> = Sample emission

8 E<sub>solvent</sub> = Solvent excitation

9 E<sub>sample</sub> = Sample excitation

10

11 The consequence was almost the same with the F-4500 fluorescence  
12 spectrophotometer (Hitachi, Japan) which was calculated by manual computation  
13 expression as follows:

14

$$15 \quad QY_{QDs} = QY_{dye} \times \frac{A_{QDs}}{A_{dye}} \times \left( \frac{n_{QDs}}{n_{dye}} \right)^2 \times \frac{1 - 10^{-D_{dye}}}{1 - 10^{-D_{QDs}}}$$

16

17

18 where A was the integrated area, n was the refractive index, and D was the optical  
19 density of QDs and dye. Moreover, the integral method was accurate and simple  
20 comparing to the traditional process.

21

22

23

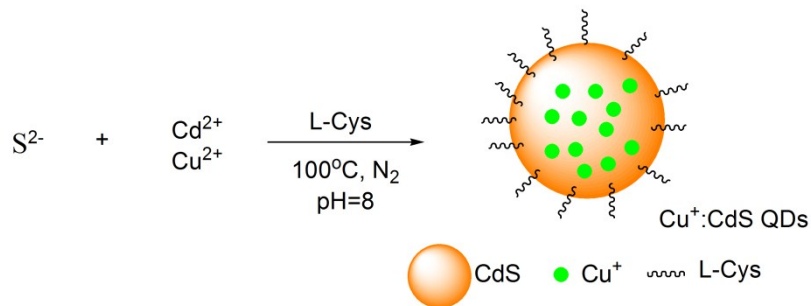

24 Fig. S2 Synthesis of water soluble Cu<sup>+</sup> doped CdS quantum dots via one-step  
25 method.

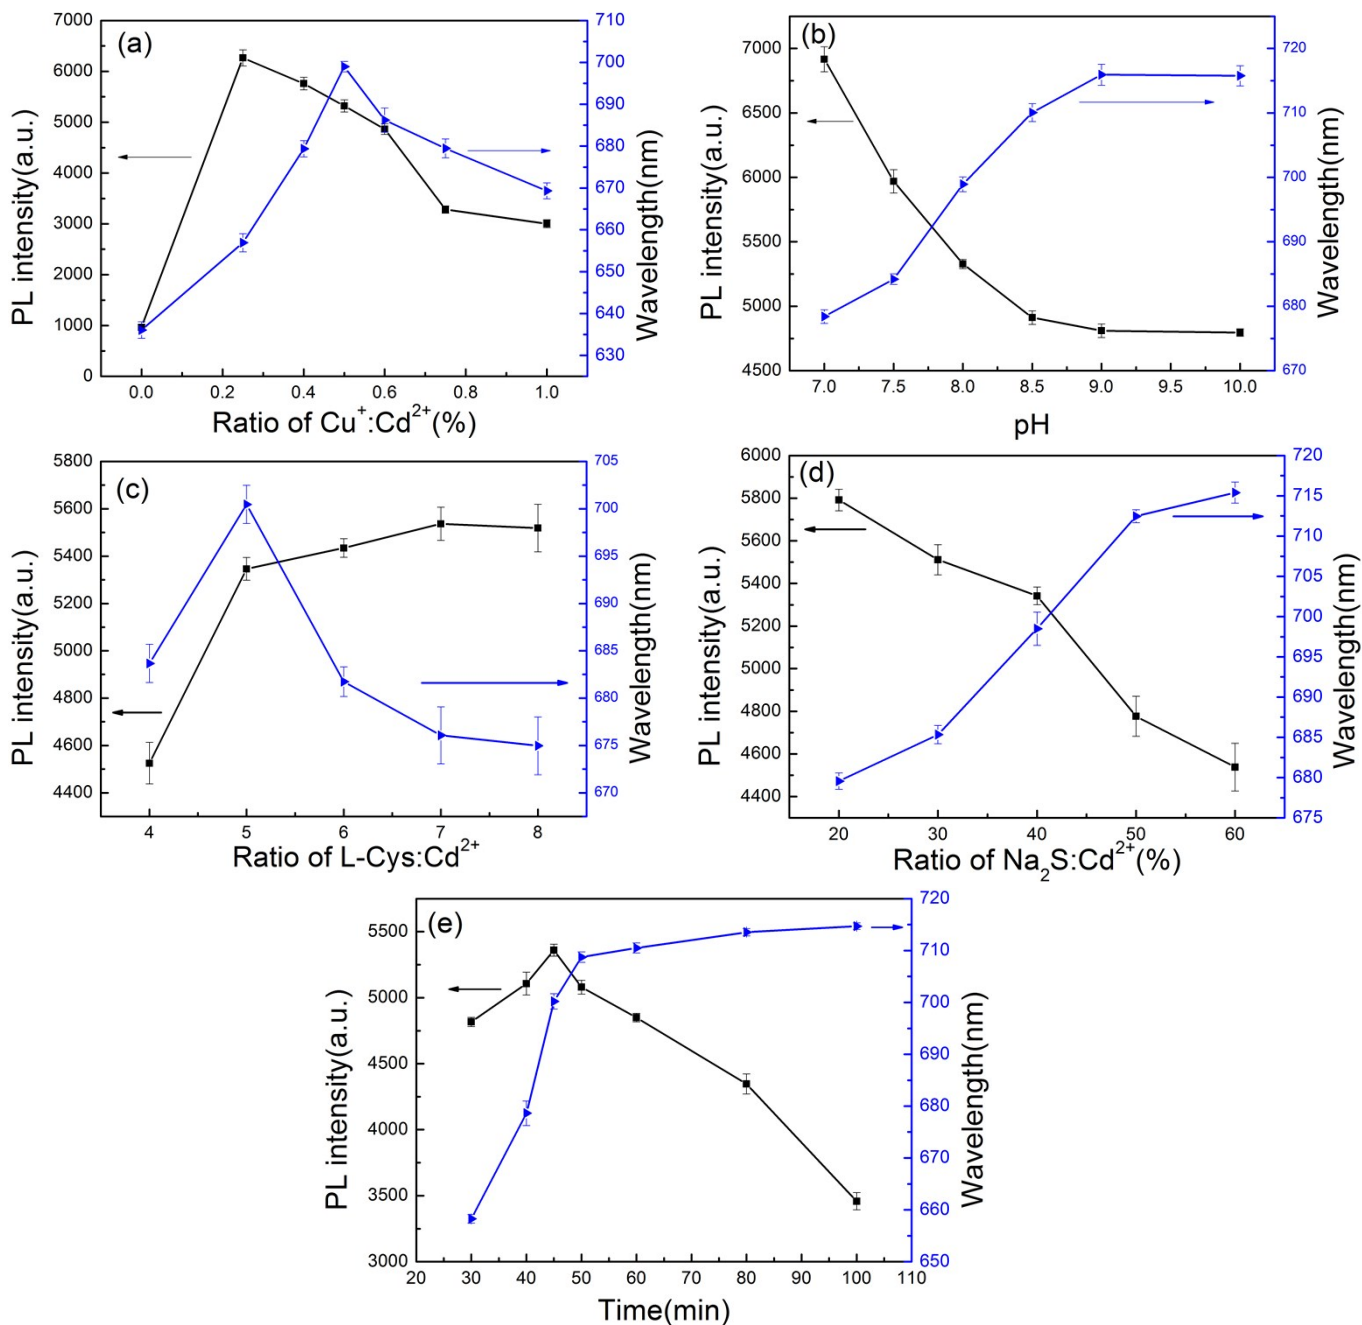

1  
 2 Fig. S3 (a) The emission wavelength and PL intensity of the Cu<sup>+</sup>:CdS QDs  
 3 synthesized with different Cu dopants amount. (b) Influence of pH on the emission  
 4 wavelength and PL intensity of the Cu<sup>+</sup>:CdS QDs. (c) The emission wavelength and  
 5 PL intensity of the Cu<sup>+</sup>:CdS QDs with different concentration of L-Cys. (d) The  
 6 emission wavelength and PL intensity of the Cu<sup>+</sup>:CdS QDs with different ratios of  
 7 Na<sub>2</sub>S:Cd<sup>2+</sup>. (e) Influence of reflux time on the emission wavelength and PL intensity  
 8 of the Cu<sup>+</sup>:CdS QDs.

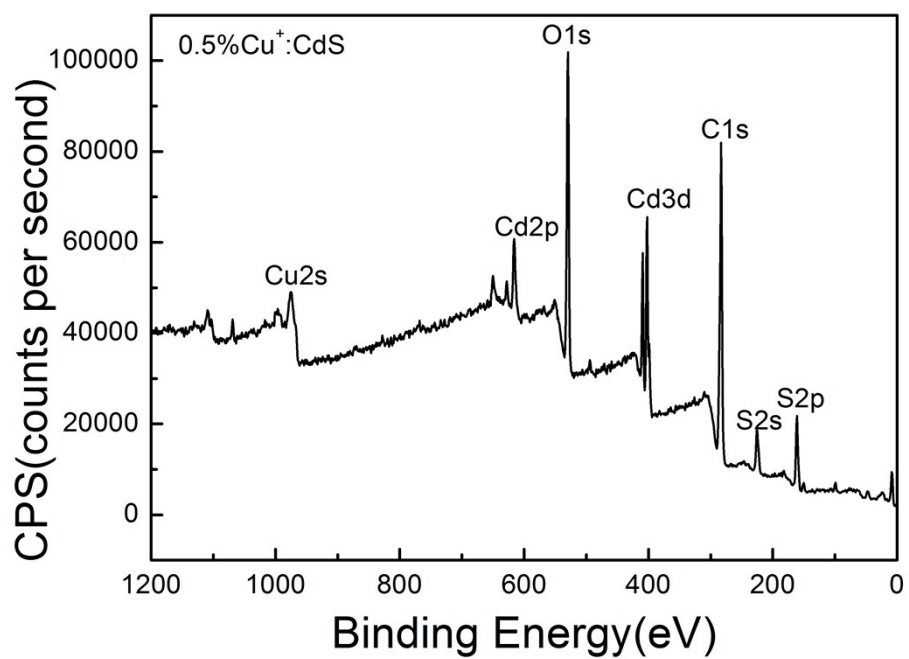

1  
 2 Fig. S4 XPS spectra of the Cu<sup>+</sup>:CdS QDs.

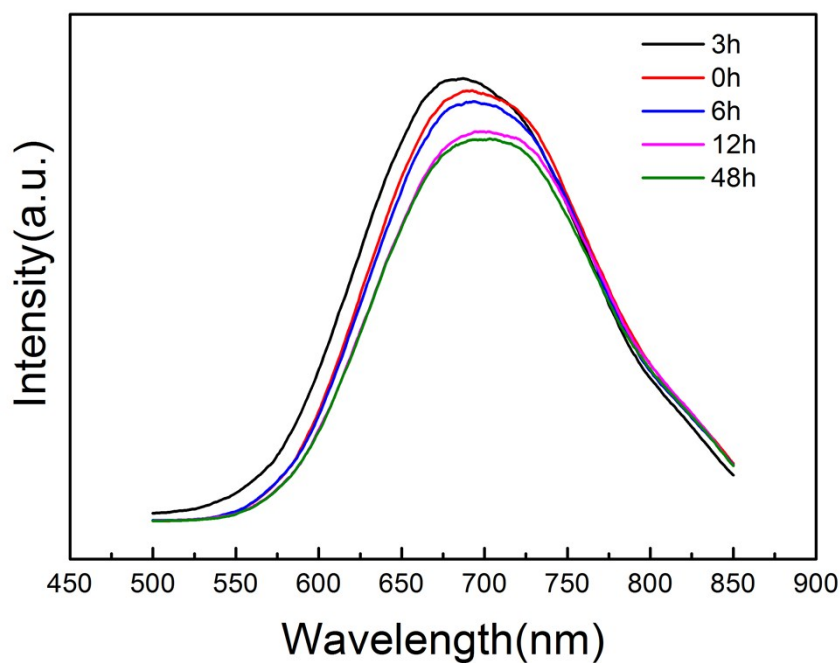

3  
 4 Fig. S5 The PL spectra of the Cu<sup>+</sup>:CdS QDs synthesized in the optimal conditions in  
 5 N<sub>2</sub> atmosphere after 0, 3, 6, 12, 48 hours.

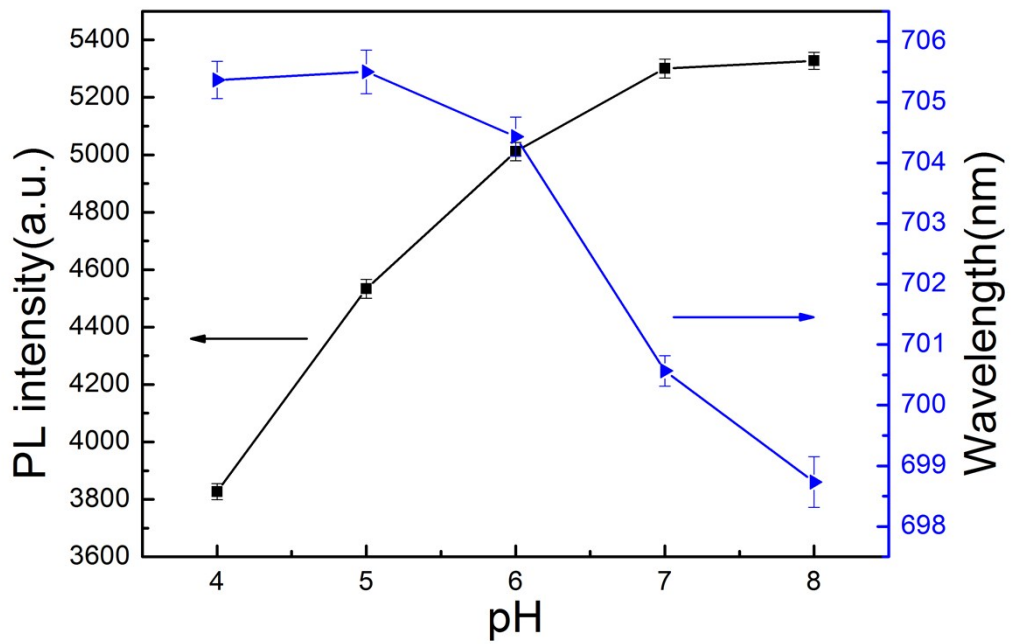

1

2 Fig. S6 The effects of pH on the fluorescence properties of the as-prepared Cu<sup>+</sup>:CdS  
3 QDs.

4

5

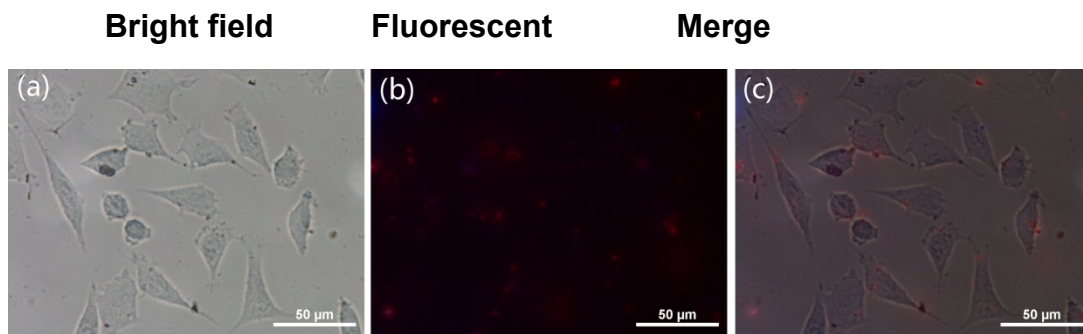

6 Fig. S7 Fluorescence images of 3T3 cells. (a) Bright field image, (b) fluorescent  
7 image and (c) merged image cells incubated for 4 hours with 20 μg/mL Cu:CdS  
8 QDs synthesized at optimal conditions in air atmosphere.

9

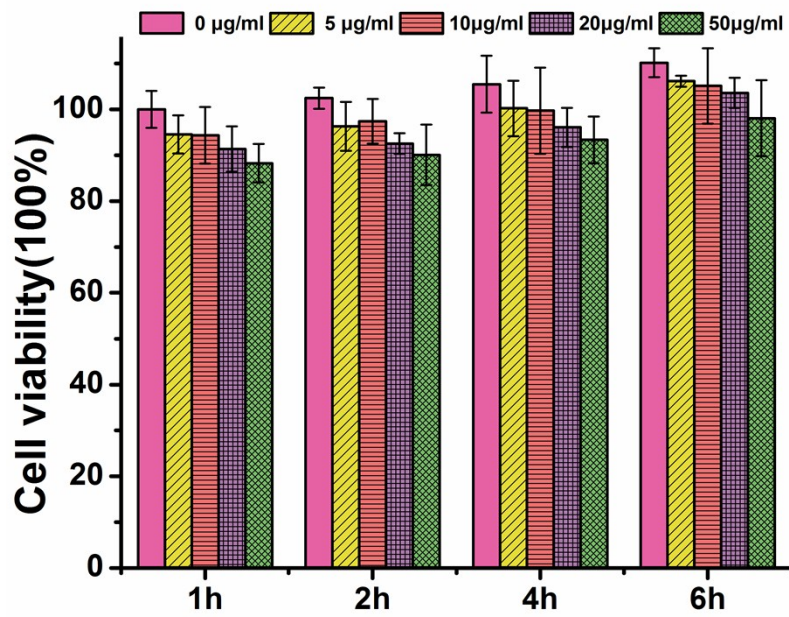

1

2 Fig. S8 Effect of the d-dots prepared in air atmosphere on the viability of HeLa  
3 cells. The viability of HeLa cells in vitro measured by MTT assay. The HeLa cells  
4 were incubated for 1 2, 4, 6 hours with different concentrations (0, 5, 10, 20, 50  
5 µg/mL) of the Cu:CdS QDs prepared in air atmosphere.

6

7
